# Supplementary material for: The glycerol stabilized calcium phosphate cluster for rapid remineralization of tooth enamel by a water-triggered transformation
Source: PubMed Central journal article supplement — Nat Commun. 2025 Jan 2;16:58. doi: 10.1038/s41467-024-54785-y (PMC11695679; doi:10.1038/s41467-024-54785-y), 2025-01-02
Supplement: 41467_2024_54785_MOESM3_ESM.pdf [file 41467_2024_54785_MOESM3_ESM.pdf]

### **Description of Additional Supplementary Files**

File Name: Supplementary Data 1

Description: The initial and final configurations and positions of the molecules during the molecular dynamic simulation.
